# Supplementary material
Source: PubMed Central journal article supplement (PMC7008215)
Supplement: mic-164-1547-s001.pdf [file mic-164-1547-s001.pdf]

**Supplementary Table 1**

| <b>primer name</b>     | <b>sequence (5' - 3')</b>                 |
|------------------------|-------------------------------------------|
| Int upstream forward   | TCACACTTCATTTCAAAAAAC                     |
| Int upstream reverse   | ATTGTTTTAGTACCGAGCTCCTCAAAGTATGCTCTCATTTA |
| Int downstream forward | GCCATTTATTATTTCTTCCGCTAATTGCTAAATGTG      |
| Int downstream reverse | GCTTTAAGTAGATTATCACTT                     |
| kanR forward           | GAGCTCGGTACTAAAACAAT                      |
| kanR reverse           | GAAGGAAATAATAAATGGC                       |
| Int seq forward        | TGGATGACTGGCAATTTACA                      |
| Int seq reverse        | CATCAATGGGACGTTGCAGT                      |
| 16S RT forward         | GGTAGTCCATGCCGTAAC                        |
| 16S RT reverse         | GAAGGCACCAATCCATCTC                       |
| hslJ RT forward        | AACCCAGCCTTCAGCTA                         |
| hslJ RT reverse        | GTCGCAACTGCTCCAAA                         |
| lolA RT forward        | CGGAGCAACAAGCAACT                         |
| lolA RT reverse        | TGCTGTGCAGACAAACC                         |
| rcnB RT forward        | CAGCCAGGAGATCGTTTA                        |
| rcnB RT reverse        | CGGTGGTGGAAAGTTGATAG                      |
| yjiM RT forward        | GGTTTAGGTGCAGGTGTAG                       |
| yjiM RT reverse        | CCCACCACAGATCCAATAC                       |
| cynT RT forward        | ATAAATAAAGGGCTTCGATT                      |
| cynT RT reverse        | CATCAAACCTTTCGGAAAGT                      |

## Supplementary Table 2

| plasmid name | sequence inserted into BamHI site of pWH1266 (5' - 3')                                                                                                                                                                                                                                                                                                                                                                                                                                                                                                                                                                                                                                                                                                                                                                                                                                                                                                                                                                                                                                                                                                                                                                                                                                                                                                                                                                                                                                                                                                                                                                                                                                                                                     |
|--------------|--------------------------------------------------------------------------------------------------------------------------------------------------------------------------------------------------------------------------------------------------------------------------------------------------------------------------------------------------------------------------------------------------------------------------------------------------------------------------------------------------------------------------------------------------------------------------------------------------------------------------------------------------------------------------------------------------------------------------------------------------------------------------------------------------------------------------------------------------------------------------------------------------------------------------------------------------------------------------------------------------------------------------------------------------------------------------------------------------------------------------------------------------------------------------------------------------------------------------------------------------------------------------------------------------------------------------------------------------------------------------------------------------------------------------------------------------------------------------------------------------------------------------------------------------------------------------------------------------------------------------------------------------------------------------------------------------------------------------------------------|
| pLnt         | ACGCACTATTCATCTGATTTCGAGCTGTACATAAATGAGAGCATACTTTGAGCAGCTGTTAGGCAATTCCCGACAGCA<br>AAAACAGCTTCCTTTTATTTTTCTTTTTTAATTCGCTATGTTCTGGCGCAATATTTAGTCTCGCTTTAGCACCTT<br>ATTATTATTGGTGGATTGCGATTTTATCTCCAGCTCTGCTTTATGCCGTATTACATCGTCGCTCAGCCAAACAGGCA<br>TTTATGCTGGGTTGGGCCTATGGGCTGGGATTATGGTTTGTCTGGGGCTTTCTGGCTTTATACTTCCATTCATGTATA<br>TGCGGATACCAATGCCATTCTCAGTGTGTTGATGATTGCGATTATGGCACTGGTGATGGGCTTATTTACTGCCATCC<br>AAACCTGGTTTTACCGCCGCTTTTTCCCGAAACGCCTTTAACTTTTGCGCCCATCTGGATTGTCTTTGAATGGGCA<br>AAAACCTGGGTGTTTACAGGATTTCCGTGGTTATTTGCGGGTTATGCATTCACCGAGCGTTTTTTAGATCACTATGC<br>ACCTTTGTTTGGTGTATTCGGTGTTCCTTTGTGGTTATTACCTTAGCTTGTGCTTTGGTTGAAATCATCAAAGGGC<br>GTATTTTCTGGCTCATTCCATCGGGTCTGCTGCTGCTCGGTGCTTGGGGTGCATCCATTTACAATTTGTGCAACCC<br>AAGAAAGCGCCTCCACTTTCTGTTTCATTAATTCAGGGCAATATTCCACAAGATTTAAATGGCTGACCGAATATCA<br>ATTTAAAACGCTCATGATTTATGCCAATTTGACGCGTTCAGAATGGGGACGAGACCTGATTGTCTGGCCTGAATCTT<br>CAATCCCAATGTTTCAAACCGATATTCAACCTTTTCTAGATGCCATGAACCAACAGGCAAAAAATCGAGGTTCCGGCA<br>TGGGTCACCTGGCATTCCCTTATTGGGATGTTACAGGTTTCGCGGGAAGTGGGGACGCCACTCTATTATAATAGCATCAT<br>GGCTTCTGGCGATAATTCTCAAGGCCTCTATAAAAAACAGCGTTTGGTTCCGTTTGGCGAATATATTCCGTTGTCTG<br>GTCTATTAAGTTGGGTACTACCAGCGTTGCAAATGATCCGTCTATGAGTGGATTTAGTCAGGGATCAAATAATCAG<br>AAACCGCTCATGATCAAAGGTCATCGACTTGCTGCTGCCATCTGTTATGAAGTGGCTTATCCAAACCTGACCAGACG<br>CAACGCAGAAAATAGCGATTTTCTGGTTACGGTATCTAACGATGCTTGGTTTACGGGTACGGCTGGCCCAATGCAAC<br>ATTTACAGATGGTGCAAATGCGGGCCAAAGAAAATGGACGCTGGTTTATCCGTGCCACCAATACTGGAGTGACTGCA<br>TTTATTGATAGCCAAGGTCATATTGTGAAACAAGCACCTATTGATAAAGAAGCTGTTTTACGTGGCGACTTACCTGC<br>AATGCAGGGTGAAACCTTATACACCCGTTTAAAGTGAAGTGGCCGATCTTACTGTTTTCGGTTCTATTGCTGATTCTGG<br>GCTGGATCTATCGTCCACGTCAGGTCGATGTGTCATTTAAATCACGTCGCTAA |

**Supplementary Table 3****Greater than 5-fold increase**

| <b>gene number</b> | <b>fold change</b> | <b>p-value</b> | <b>homolog</b> | <b>localization</b>        | <b>COG</b>           | <b>function</b>                                           |
|--------------------|--------------------|----------------|----------------|----------------------------|----------------------|-----------------------------------------------------------|
| ACIAD0040          | 184.72             | 0.0050         |                | periplasm                  | unknown function     | hypothetical protein                                      |
| ACIAD0005          | 67.67              | 0.0022         | <i>lacL</i>    | cytoplasm                  | txn factor           | DNA-binding transcriptional repressor                     |
| ACIAD0511          | 42.26              | 0.0043         | <i>hslJ</i>    |                            | chaperone            | heat shock protein                                        |
| ACIAD2419          | 41.09              | 0.0043         |                | inner membrane             | unknown function     | hypothetical protein                                      |
| ACIAD0960          | 39.58              | 0.0018         |                | cytoplasm                  | metabolism           | succinate-semialdehyde dehydrogenase [NADP+] (GabD-like)  |
| ACIAD1430          | 38.17              | 0.0012         | <i>areC</i>    | cytoplasm                  | metabolism           | benzaldehyde dehydrogenase II                             |
| ACIAD0625          | 28.71              | 0.0023         | <i>fimH</i>    | outer membrane lipoprotein | protein secretion    | minor fimbrial subunit, D-mannose specific adhesin        |
| ACIAD0061          | 27.24              | 0.0080         | <i>yfbL</i>    | periplasm                  | unknown function     | predicted peptidase                                       |
| ACIAD2748          | 23.96              | 0.0033         |                | cytoplasm                  | stress               | peroxidase/hydrolase                                      |
| ACIAD2081          | 23.09              | 0.0056         |                | periplasm                  | transporter          | periplasmic protein involved in nickel/cobalt export      |
| ACIAD3290          | 23.00              | 0.0013         |                | cytoplasm                  | metabolism           | NADH-flavin reductase                                     |
| ACIAD2009          | 21.19              | 0.0032         | <i>murA</i>    | cytoplasm                  | envelope             | UDP-N-acetylglucosamine enolpyruvoyl transferase          |
| ACIAD0328          | 20.69              | 0.0099         | <i>ydgE</i>    | cytoplasm                  | transporter          | putative transport protein, major facilitator superfamily |
| ACIAD3646          | 20.53              | 0.0021         |                | cytoplasm                  | protein modification | protease                                                  |
| ACIAD3384          | 17.04              | 0.0043         |                | inner membrane             | transporter          | sulfate permease                                          |
| ACIAD0041          | 16.85              | 0.0063         |                | periplasm                  | unknown function     | hypothetical protein                                      |
| ACIAD1429          | 16.68              | 0.0039         | <i>areB</i>    | cytoplasm                  | metabolism           | aryl-alcohol dehydrogenase                                |

|           |       |        |             |                            |                  |                                                         |
|-----------|-------|--------|-------------|----------------------------|------------------|---------------------------------------------------------|
| ACIAD3411 | 13.56 | 0.0026 | <i>argP</i> | cytoplasm                  | txn factor       | DNA-binding transcriptional dual regulator              |
| ACIAD0620 | 13.23 | 0.0067 | <i>rcnB</i> | periplasm                  | transporter      | periplasmic protein involved in nickel/cobalt export    |
| ACIAD3649 | 12.16 | 0.0027 | <i>yfdL</i> |                            | unknown function | hypothetical protein                                    |
| ACIAD0062 | 10.88 | 0.0067 | <i>nadC</i> | cytoplasm                  | nucleotide       | nicotinate-nucleotide pyrophosphorylase                 |
| ACIAD2937 | 10.73 | 0.0067 | <i>lolA</i> | periplasm                  | membrane protein | outer membrane lipoprotein carrier protein              |
| ACIAD0310 | 10.11 | 0.0001 | <i>yjiM</i> | periplasm                  | unknown function | hypothetical protein                                    |
| ACIAD0150 | 9.84  | 0.0001 | <i>ygiW</i> | outer membrane lipoprotein | stress           | stress-induced protein                                  |
| ACIAD3109 | 9.49  | 0.0039 | <i>macA</i> | inner membrane             | transporter      | macrolide ABC transporter efflux pump subunit           |
| ACIAD2124 | 8.87  | 0.0031 |             | cytoplasm                  | metabolism       | siderophore biosynthesis protein                        |
| ACIAD3110 | 8.28  | 0.0079 | <i>macB</i> | inner membrane             | transporter      | macrolide ABC transporter ATP-binding/membrane protein  |
| ACIAD2122 | 7.98  | 0.0080 |             | inner membrane             | transporter      | MFS superfamily multidrug resistance protein            |
| ACIAD0159 | 7.76  | 0.0012 |             | cytoplasm                  | metabolism       | glutathione S-transferase                               |
| ACIAD0145 | 7.59  | 0.0061 | <i>rne</i>  | outer membrane lipoprotein | nucleotide       | ribonuclease E                                          |
| ACIAD2476 | 7.49  | 0.0050 | <i>yhhW</i> | cytoplasm                  | unknown function | pirin-like protein                                      |
| ACIAD2668 | 7.37  | 0.0000 | <i>ompF</i> | outer membrane             | membrane protein | outer membrane protein F                                |
| ACIAD3111 | 7.31  | 0.0042 |             | outer membrane             | membrane protein | outer membrane protein precursor                        |
| ACIAD3529 | 7.19  | 0.0020 | <i>nfrB</i> | periplasm                  | mobile elements  | bacteriophage N4 receptor, inner membrane subunit       |
| ACIAD0199 | 6.99  | 0.0084 |             | cytoplasm                  | metabolism       | nitrite reductase/ring-hydroxylating dioxygenase        |
| ACIAD1315 | 6.98  | 0.0001 | <i>rclA</i> | outer membrane lipoprotein | metabolism       | predicted oxidoreductase with FAD/NAD(P)-binding domain |
| ACIAD3381 | 6.96  | 0.0018 | <i>poxB</i> | cytoplasm                  | metabolism       | pyruvate dehydrogenase (cytochrome)                     |
| ACIAD0711 | 6.93  | 0.0001 | <i>ybeT</i> | outer membrane             | membrane protein | conserved outer membrane protein                        |

|           |      |        |             |                            |                      |                                                             |
|-----------|------|--------|-------------|----------------------------|----------------------|-------------------------------------------------------------|
| ACIAD1619 | 6.88 | 0.0073 | <i>lpxL</i> | outer membrane             | envelope             | lauroyl acyltransferase                                     |
| ACIAD1024 | 6.81 | 0.0053 | <i>xdhA</i> | periplasm                  | nucleotide           | xanthine dehydrogenase subunit                              |
| ACIAD3238 | 6.78 | 0.0032 |             | cytoplasm                  | unknown function     | hypothetical protein                                        |
| ACIAD0647 | 6.76 | 0.0015 |             | cytoplasm                  | metabolism           | antioxidant protein                                         |
| ACIAD3279 | 6.57 | 0.0043 |             | periplasm                  | mobile elements      | IS2 element protein                                         |
| ACIAD2121 | 6.52 | 0.0072 | <i>yidK</i> | cytoplasm                  | transporter          | putative transport protein, sodium:solute symport family    |
| ACIAD0204 | 6.36 | 0.0080 |             | cytoplasm                  | nucleotide           | cytidine and deoxycytidylate deaminase zinc-binding protein |
| ACIAD0810 | 6.04 | 0.0017 | <i>lepB</i> | outer membrane lipoprotein | protein modification | leader peptidase (signal peptidase I)                       |
| ACIAD0027 | 5.84 | 0.0013 | <i>rutA</i> | cytoplasm                  | nucleotide           | pyrimidine oxygenase                                        |
| ACIAD2819 | 5.80 | 0.0072 |             | cytoplasm                  | metabolism           | gluconolactonase                                            |
| ACIAD2320 | 5.40 | 0.0000 | <i>yidB</i> | cytoplasm                  | unknown function     | hypothetical protein                                        |
| ACIAD1226 | 5.38 | 0.0043 | <i>yjhF</i> | inner membrane lipoprotein | transporter          | putative transport protein, gluconate permease family       |
| ACIAD0198 | 5.37 | 0.0011 |             | outer membrane lipoprotein | membrane protein     | surface lipoprotein                                         |
| ACIAD3163 | 5.28 | 0.0071 | <i>puuA</i> | outer membrane             | metabolism           | glutamate-putrescine ligase                                 |
| ACIAD0039 | 5.26 | 0.0043 | <i>argA</i> | cytoplasm                  | metabolism           | N-acetylglutamate synthase                                  |
| ACIAD1611 | 5.21 | 0.0084 |             | cytoplasm                  | metabolism           | acetyl-CoA synthetase/AMP-(fatty) acid ligase               |
| ACIAD1446 | 5.20 | 0.0048 | <i>catB</i> | cytoplasm                  | metabolism           | muconate cycloisomerase I                                   |
| ACIAD2759 | 5.05 | 0.0075 |             | cytoplasm                  | txn factor           | GntR family transcriptional regulator                       |
| ACIAD3408 | 5.02 | 0.0001 |             | cytoplasm                  | nucleotide           | DNA/RNA non-specific endonuclease G protein                 |

---

**Greater than 5-fold decrease**

|           |         |        |            |                |                      |                                   |
|-----------|---------|--------|------------|----------------|----------------------|-----------------------------------|
| ACIAD0415 | -1066.9 | 0.0024 | <i>Int</i> | inner membrane | protein modification | apo-lipoprotein N-acyltransferase |
|-----------|---------|--------|------------|----------------|----------------------|-----------------------------------|

|           |        |        |             |                            |                   |                                                              |
|-----------|--------|--------|-------------|----------------------------|-------------------|--------------------------------------------------------------|
| ACIAD0860 | -11.54 | 0.0049 | <i>aaeA</i> | outer membrane lipoprotein | transporter       | hydroxylated, aromatic carboxylic acid exporter              |
| ACIAD1272 | -10.21 | 0.007  | <i>cynT</i> | inner membrane lipoprotein | metabolism        | carbonic anhydrase                                           |
| ACIAD0189 | -7.89  | 0.0074 | <i>ebgA</i> | cytoplasm                  | metabolism        | evolved beta-D-galactosidase, alpha subunit                  |
| ACIAD1487 | -7.49  | 0.0041 |             | outer membrane             | membrane protein  | outer membrane protein                                       |
| ACIAD0387 | -7.1   | 0.0031 |             | outer membrane lipoprotein | protein secretion | type I secretion                                             |
| ACIAD0940 | -6.59  | 0.0053 |             | outer membrane             | protein secretion | hemagglutinin/hemolysin-related protein                      |
| ACIAD1488 | -6.27  | 0.0018 |             | inner membrane             | transporter       | protein secretion efflux ABC transporter ATP-binding protein |
| ACIAD1614 | -6.12  | 0.0007 |             | cytoplasm                  | metabolism        | nitrile hydratase activator                                  |
| ACIAD1776 | -6.09  | 0.0011 |             | cytoplasm                  | stress            | general stress protein                                       |
| ACIAD1489 | -6.02  | 0.0019 |             | inner membrane             | transporter       | protein secretion efflux system ABC transporter              |
| ACIAD0336 | -5.77  | 0.0099 | <i>rluA</i> | outer membrane lipoprotein | translation       | 23S rRNA and tRNA pseudouridine synthase                     |
| ACIAD3677 | -5.71  | 0.005  | <i>yggE</i> | cytoplasm                  | unknown function  | conserved protein                                            |
| ACIAD0242 | -5.63  | 0.008  | <i>chlL</i> | cytoplasm                  | metabolism        | magnesium chelatase                                          |
| ACIAD1744 | -5.58  | 0.0005 | <i>aspA</i> | cytoplasm                  | metabolism        | aspartate ammonia-lyase                                      |
| ACIAD3338 | -5.55  | 0.0011 | <i>comP</i> | inner membrane             | nucleotide        | competence factor involved in DNA binding and uptake         |
| ACIAD0939 | -5.54  | 0.0017 |             | outer membrane             | protein secretion | hemolysin activator protein                                  |
| ACIAD2843 | -5.49  | 0.0043 |             | periplasm                  | unknown function  | hypothetical protein                                         |
| ACIAD2482 | -5.34  | 0.0014 | <i>dusA</i> | cytoplasm                  | translation       | tRNA-dihydrouridine synthase A                               |
| ACIAD2866 | -5.31  | 0.0061 |             | cytoplasm                  | protein secretion | hemagglutinin/hemolysin-related protein                      |
| ACIAD1651 | -5.16  | 0.008  | <i>pcaT</i> | inner membrane             | transporter       | major facilitator superfamily alpha-ketoglutarate permease   |
| ACIAD0240 | -5.1   | 0.0057 | <i>chiP</i> | outer membrane             | metabolism        | chitobiose outer membrane channel                            |
